# Supplementary material
Source: Royal Society of Chemistry journal article supplement (doi:10.1039/d6mh00249h)
Supplement: d6mh00249h2.pdf [file d6mh00249h2.pdf]

## Supporting Information

### **Sustainable and Scalable Polyphenolic Bioadhesives for Hemostasis and Surface Functionalization**

Eunu Kim<sup>a</sup>, Jeongin Seo<sup>a</sup>, and Haeshin Lee<sup>a,b,\*</sup>

<sup>a</sup>Department of Chemistry, Korea Advanced Institute of Science and Technology (KAIST),  
291 Daehak-ro, Yuseong-gu, Daejeon 34141, Republic of Korea

<sup>b</sup>Polyphenol Factory Inc., 193 Moonji-ro, Yuseong-gu, Daejeon 34051, Republic of Korea

\* E-mail: [haeshin@kaist.ac.kr](mailto:haeshin@kaist.ac.kr)

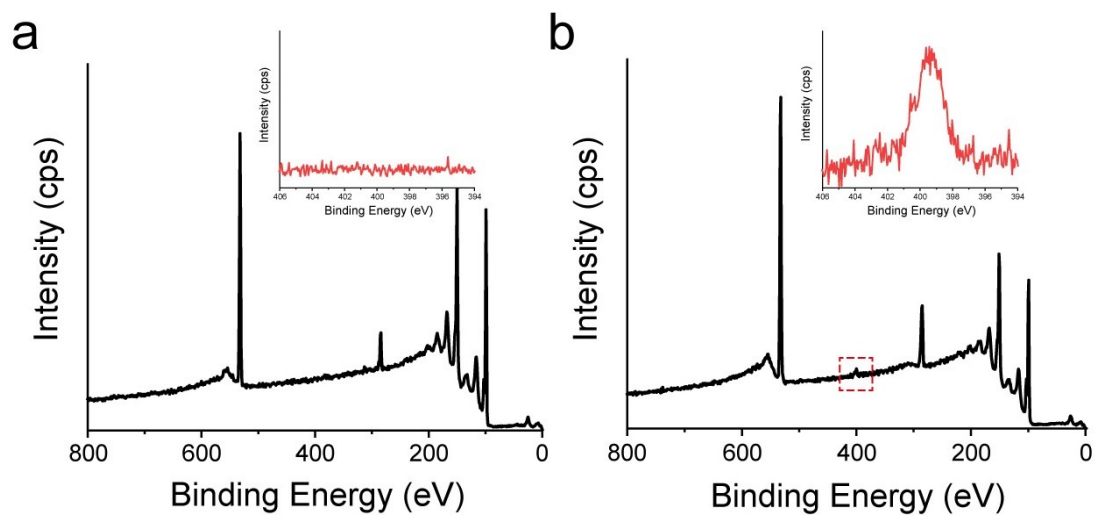

**Figure S1.** XPS survey spectra (black) and corresponding N1s (inset, red) spectra of SiO<sub>2</sub> substrates (a) before and (b) after 5 min CHI-B coating.

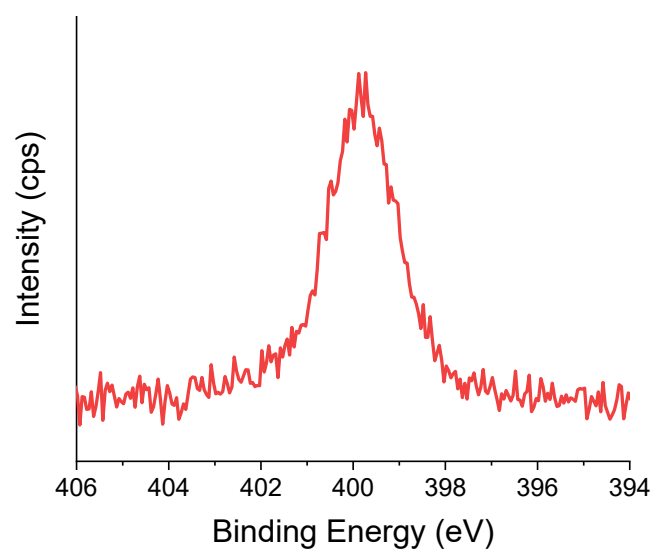

**Figure S2.** XPS N1s spectrum of CHI-B coated slide glass after 1 year.

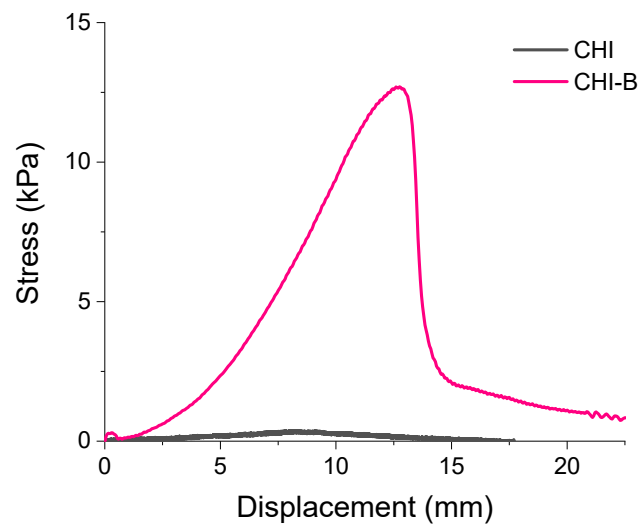

**Figure S3.** Stress–displacement curves of CHI (black) and CHI-B (pink) adhered to mouse skin. CHI and CHI-B were first applied to mouse skin, and adhesive tape (Scotch tape) was attached to the opposite side prior to tensile testing.
